# Supplementary material for: Host Shifts from Lamiales to Brassicaceae in the Sawfly Genus Athalia
Source: PLoS One. 2012 Apr 2;7(4):e33649. doi: 10.1371/journal.pone.0033649 (PMC3317781; doi:10.1371/journal.pone.0033649)
Supplement: Table S1 — Collection data for the sawfly specimens used in the molecular study and GenBank accession numbers. (XLS) [file pone.0033649.s001.xls]

## Sheet: Sheet1
Appendix 1. Collection data for the sawfly specimens used in the molecular study and GenBank accession numbers.
Species	Stage1	Field host2	Location	Date	Collector	Code3	GenBank Accession Numbers
				(day.month.year)			COI	28 S
Athalia ahngeri?	Ad. M		Lake Baikal, Russia	16.08.1993	H. Roininen	P3427	JQ649479	JQ649518
Athalia ahngeri?	Ad. F		Lake Baikal, Russia	16.08.1993	H. Roininen	P3428	JQ649480	JQ649519
Athalia ancilla	Ad. F		Switzerland	2002	A. Barker	P2215	JQ649465	JQ649500
Athalia bicolor	Ad. F		Würzburg, Germany	2008	C. Müller	P3459	JQ649489	JQ649524
Athalia circularis	Ad. M	Ajuga reptans	Würzburg, Germany	15.05.2010	S. Opitz	P3378	JQ649482	JQ649503
Athalia circularis	Ad. M		Bad Krankenhauser, Germany	30.05.2003	J.-L. Boevé	P2342	JQ649466	JQ649501
Athalia cordata	Ad. F	Ajuga reptans	Würzburg, Germany	15.05.2010	S. Opitz	P3377	JQ649481	JQ649502
Athalia cordata	Ad. M		Ilfeld, Germany	20.05.2001	A. Taeger	P2083	JQ649490	JQ649525
Athalia cornubiae	Larval exuvia		Uccle, Belgium	08.08.2009	J.-L. Boevé	P3153	JQ649467	JQ649520
Athalia cornubiae	Larva	Sedum dasyphyllum	Müncheberg, Germany	19.08.2010	S. Blank	P3394	JQ649485	JQ649521
Athalia excisa	Ad. F	Brassica sp.	Chancho, Ethiopia	07.10.2010	J.-L. Boevé	P3422.a	JQ649488	JQ649516
Athalia flavobasalis	Ad. F	Ajuga integrifolia	Sebeta, Ethiopia	04.10.2010	J.-L. Boevé, A. Pauly	P3420	JQ649476	JQ649514
Athalia guillarmodi	Ad. M		Royal Natal Nat. Park, South Africa	05-08.04.1998	C. Saure	P3402	JQ649487	JQ649523
Athalia himantopus	Ad. F		Hluhluwe Game Res., South Africa	05.12.1995	F. Koch	P3401	JQ649486	JQ649507
Athalia incomta	Ad. M	Tecomaria capensis	Tate Vondo, South Africa	17-20.03.2006	F. Koch	P3403	JQ649470	JQ649508
Athalia incomta	Ad. M		Mt. Lajuma, South Africa	08-14.03.2006	F. Koch	P3404	JQ649471	JQ649509
Athalia liberta	Ad. F	Ajuga reptans	Würzburg, Germany	15.05.2010	S. Opitz	P3380A	JQ649483	JQ649504
Athalia liberta	Ad. M		Ilfeld, Germany	20.05.2001	A. Taeger	P2084	JQ649491	JQ649526
Athalia lugens	Ad. F	Ajuga reptans	Würzburg, Germany	15.05.2010	S. Opitz	P3379	JQ649497	JQ649532
Athalia lugens	Ad. F	Achillea ptarmica	Völkershain, Germany	12.08.2007	H.-J. Flügel	P3386	JQ649498	JQ649533
Athalia lugens	Ad. F		Jesberg, Germany	14.07.2007	H.-J. Flügel	P3387	JQ649499	JQ649534
Athalia marginipennis	Ad. F		Roodeplaat, South Africa	2.2009	D. Visser	P3399	JQ649468	JQ649506
Athalia obsoleta	Ad. M		Debre Zeyit, Ethiopia	06.10.2010	J.-L. Boevé	P3421	JQ649477	JQ649515
Athalia rosae rosae	Ad. M		Rhein Valley, Germany	06.09.2000	A. Barker	P2066	JQ649492	JQ649527
Athalia rosae ruficornis	Ad. M	Raphanus sativus	Japan	10.2009	R. Nishida	P3383	JQ649484	JQ649505
Athalia scioensis	Ad. F		Sebeta, Ethiopia	04.10.2010	J.-L. Boevé, D. Negessa	P3418	JQ649475	JQ649513
Athalia scutellariae	Larva	Scutellaria galericulata	Etzen, Austria	03.08.2001	E. Altenhofer	P2011	JQ649493	JQ649528
Athalia sp.	Larva	Brassicaceae	Chancho, Ethiopia	07.10.2010	J.-L. Boevé	P3423	JQ649478	JQ649517
Athalia ustipennis	Ad. M		Roodeplaat, South Africa	2.2009	D. Visser	P3400	JQ649469	JQ649522
Athalia vollenhoveni	Ad. M		Sebeta, Ethiopia	03.10.2010	J.-L. Boevé	P3414	JQ649472	JQ649510
Athalia vollenhoveni	Ad. M	Brassica napus	Holeta, Ethiopia	03.10.2010	J.-L. Boevé	P3415.a	JQ649473	JQ649511
Athalia vollenhoveni	Ad. M		Sebeta, Ethiopia	04.10.2010	J.-L. Boevé, A. Pauly	P3416	JQ649474	JQ649512
Outgroup
Arge ustulata	Larva	Crataegus sp.	Grimminge, Belgium	04.09.2000	J.-L. Boevé	P1779	JQ649495	JQ649530
Giladeus tuxius	Ad. M		Nahuel Huapi, Argentina	22.11-06.12.2002	S. Blank, C. Kutzscher	P2299	JQ649496	JQ649531
Gilpinia hercyniae	Eonymph	Picea abies	rearing, Germany	12.2001	R. Mumm	P2021	JQ649494	JQ649529
?-Identity of A. ahngeri is uncertain.
1 Stages: Ad. – adult; M – male; F – female; Eonymph – last larval instar that does not feed anymore.
2 The field host is the plant species on which the specimen was collected but it does not necessarily reflect, for an adult, the larval host plant.
3 The codes refer to the voucher of the specimens deposited at the Royal Belgian Institute of Natural Sciences.
